# Supplementary material for: Ethyl Acetate Fraction from Leandra dasytricha (A. Gray) Cong. Leaves Promotes Vasodilatation and Reduces Blood Pressure in Normotensive and Hypertensive Rats
Source: Evid Based Complement Alternat Med. 2021 Nov 15;2021:7203934. doi: 10.1155/2021/7203934 (PMC8608499; doi:10.1155/2021/7203934)
Supplement: Supplementary Materials — Figure S1: molecular structure of nothofagin (13) identified in the ethyl acetate fraction from L. dasytricha. [file 7203934.f1.docx]

**Supplementary material**

# Ethyl acetate fraction from *Leandra dasytricha* (A. Gray) Cong. leaves promotes vasodilatation and reduces blood pressure in normotensive and hypertensive rats

Rita de Cassia Vilhena da Silva1, Luísa Nathália Bolda Mariano1, Eleine Renata Bidinha1, Camila Leandra Bueno de Almeida1, Valdir Cechinel-Filho1, Vanessa Samudio Santos Zanuncio2, Denise Brentan Silva2, Arquimedes Gasparotto Junior3, Priscila de Souza1*

1Postgraduate Program in Pharmaceutical Sciences, Nucleus of Chemical-Pharmaceutical Investigations, University of Vale do Itajaí, Itajaí, Brazil.

2Laboratory of Natural Products and Mass Spectrometry, Faculty of Pharmaceutical Sciences, Food and Nutrition, Federal University of Mato Grosso do Sul, Campo Grande, MS, Brazil.

3Laboratory of Cardiovascular Pharmacology, Faculty of Health Sciences, Federal University of Grande Dourados, Dourados, MS, Brazil.

*Corresponding author:

Dr. Priscila de Souza

Postgraduate Program in Pharmaceutical Sciences, Nucleus of Chemical-Pharmaceutical Investigations.

University of Vale do Itajaí, 458 Uruguai St., 88302-202, Itajaí, SC, Brazil.

Phone: +55 (47) 3341-8160

E-mail: priscilasouza_rc@yahoo.com.br


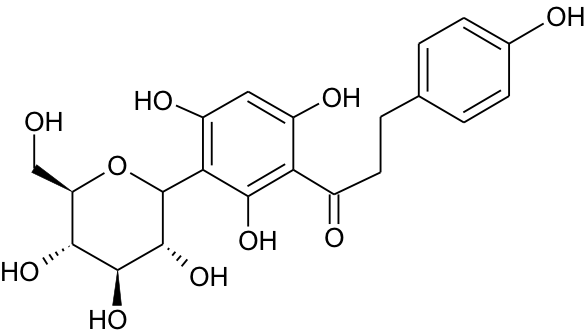


**Figure S1:** Molecular structure of nothofagin (**13**) identified in the ethyl acetate fraction from *L. dasytricha*.
